# Supplementary material
Source: PubMed Central journal article supplement (PMC5149113)
Supplement: NIHMS821006-supplement-Supplemental_Material.pdf [file NIHMS821006-supplement-Supplemental_Material.pdf]

## **ASI-S STANDARDIZED FOLLOW-UP QUESTIONS**

Respondents may sometimes provide an unexpected response. When this occurs, the standardized follow-up questions below should be used. Otherwise, respondent should be directed to:

*“Please choose the response that best describes \_\_\_\_\_’s behavior during the past 3 months.”*

Discontinue follow-up questions and mark “N/A” if respondent indicates they cannot or will not answer item.

**Respondent starts crying:** “I know it can be hard to answer some of these questions. Would you like to take a break for a few minutes?”

**Respondent says that the response depends on the situation:** “Ok, select the answer that best describes \_\_\_\_\_’s behavior in general across different situations.”

**Respondent is distracted by specific examples:** “These are just examples. Does \_\_\_\_\_ show any behavior like this/of this kind?”

**Respondent gives lengthy responses without selecting an answer choice:** “Ok, that is important information for the parent appointment. For this question, please pick one of these 4 response choices. Which option best describes \_\_\_\_\_’s behavior during the past 3 months? [Re-read options]”

**Respondent is regularly interrupting, giving unnecessary information, or changing the subject. After 2<sup>nd</sup> instance of this:** “Ok, these are the kinds of details you can bring up at the parent appointment. For today, please use the response options so that we can have time to get to all of the questions.”

**Respondent answers with something that is not listed as a choice:** “What if you had to pick one of these 4 response choices? Which option best describes \_\_\_\_\_’s behavior during the past 3 months? [Re-read options]”

**If respondent says they are not sure what to select:** “I know that the choices may not describe \_\_\_\_\_ exactly, but please pick the option that fits best. Would you like me to re-read the question?”

**Respondent indicates their child “used to do that/just started doing that”:** “Remember to think about \_\_\_\_\_’s behavior during the past 3 months. How often has this happened during the past 3 months?”

**Respondent seems distracted or does not answer:** “Would you like me to re-read the question?” OR “Do you need to take a break?”

**Respondent asks about what (behavior) counts:** “I’m sorry but I don’t know the answer to that. Just pick the answer that you think fits best. If it’s helpful, I can re-read the question.”

**Respondent asks if something is abnormal or normal or asks for any clinical advice:** “That is a good question to ask during your parent appointment. Let’s continue...”

**\*If respondent verbally expresses confusion even after supplementary information and or follow-up questions have been provided:** “If you don’t think you can use any of the 4 response options, we can move on to the next question. I can also repeat the response options.”

[Mark Missing/Unknown if respondent indicates he/she cannot or will not answer item.]
